# Supplementary material for: Biomimetic mineralization of anionic gelatin hydrogels: effect of degree of methacrylation
Source: Royal Society of Chemistry journal article supplement (doi:10.1039/c4ra02271h), 2014-01-01
Supplement: c4ra02271h1.pdf [file c4ra02271h1.pdf]

## Supporting Information

### Biomimetic mineralization of anionic gelatin hydrogels with various degree of methacrylation

Lei Zhou<sup>†</sup>, Guoxin Tan<sup>a,\*</sup>, Ying Tan<sup>a</sup>, Hang Wang<sup>a</sup>, Jingwen Liao<sup>b</sup>, Chengyun Ning<sup>b,\*</sup>

<sup>a</sup>*School of Chemical Engineering and Light Industry, Guangdong University of Technology, Guangzhou, 510006, China*

<sup>b</sup>*College of Materials Science and Technology, South China University of Technology, Guangzhou, 510641, China*

#### Corresponding Author

\*Guoxin Tan; \*Chengyun Ning

E-mail: tanguoxin@126.com (G.T.); imcyning@scut.edu.cn (C.N.)

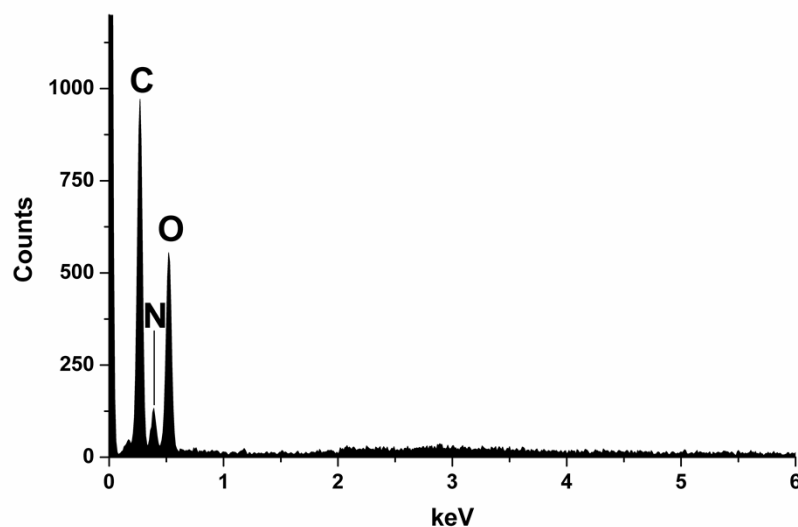

Fig S1. Energy dispersive X-ray spectroscopy (EDX) of non-mineralized hydrogels did not show calcium or phosphorous peaks.

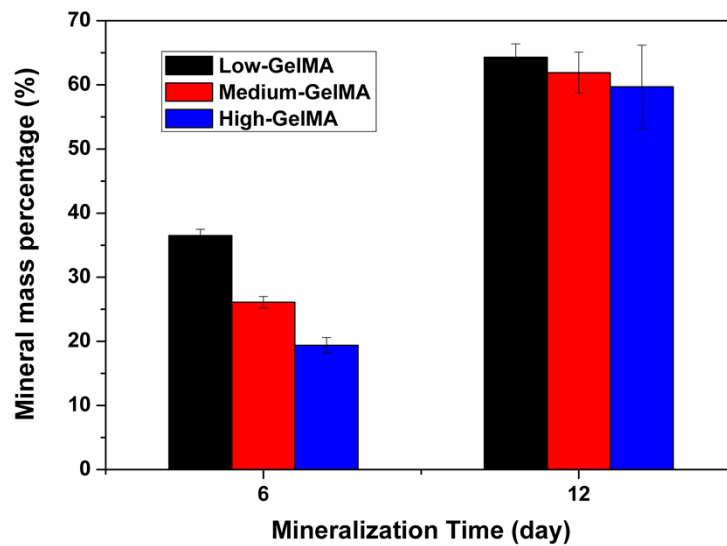

Fig S2. Quantification of the mineral content (weight percentage) within the GelMA hydrogels of various DM at days 6 and 12 in mSBF by direct weighing measurements.

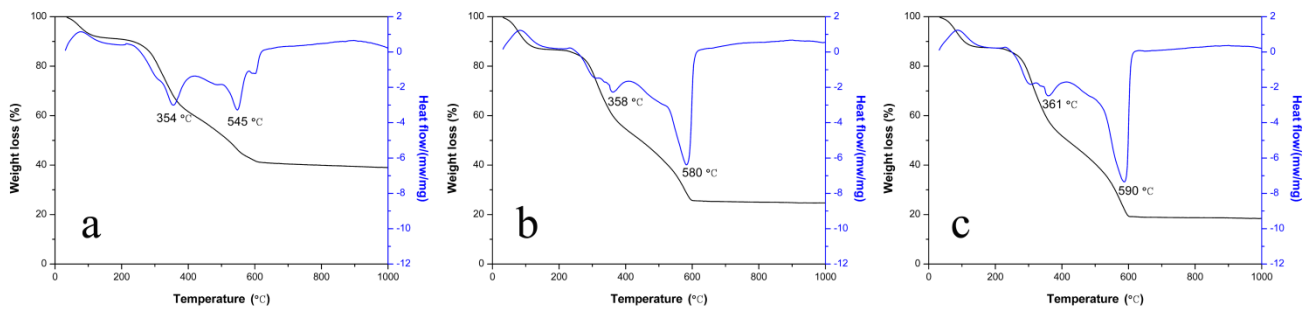

Fig S3. TG/DSC of mineralized GelMA hydrogels with low (a), medium (b) and high (c) DM. Black line below indicates TG results and blue line at top indicates DSC results. The temperatures of peak maximum of the exothermic reactions are indicated.
